# Supplementary material for: Porous dimanganese trioxide microflowers derived from microcoordinations for flexible solid-state asymmetric supercapacitors
Source: Royal Society of Chemistry journal article supplement (doi:10.1039/c6nr02267g), 2016-01-01
Supplement: c6nr02267g1.pdf [file c6nr02267g1.pdf]

**Electronic Supplementary Information (ESI) for**

**Porous dimanganese trioxide microflowers derived from microcoordinations for  
flexible solid-state asymmetric supercapacitors**

Huan Pang,<sup>a,b,c</sup> Xinran Li,<sup>c</sup> Bing Li,<sup>c</sup> Yizhou Zhang,<sup>b</sup> Qunxing Zhao,<sup>b</sup> Wen-Yong Lai<sup>\*b,d</sup> and Wei  
Huang<sup>\*b,d</sup>

- a. College of Chemistry and Chemical Engineering, Anyang Normal University, Anyang, Henan  
455002 (China)
- b. Key Laboratory for Organic Electronics & Information Displays (KLOEID), Institute of  
Advanced Materials (IAM), Jiangsu National Synergetic Innovation Center for Advanced  
Materials (SICAM), Nanjing University of Posts and Telecommunications (NUPT), Nanjing,  
Jiangsu 210023 (China)
- c. College of Chemistry and Chemical Engineering, Yangzhou University, Yangzhou, Jiangsu  
225002 (China)
- d. Key Laboratory of Flexible Electronics (KLOFE) & Institute of Advanced Materials (IAM),  
Jiangsu National Synergetic Innovation Center for Advanced Materials (SICAM), Nanjing Tech  
University (NanjingTech), 30 South Puzhu Road, Nanjing 211816 (China)

\*E-mail: iamwylai@njupt.edu.cn; wei-huang@njtech.edu.cn

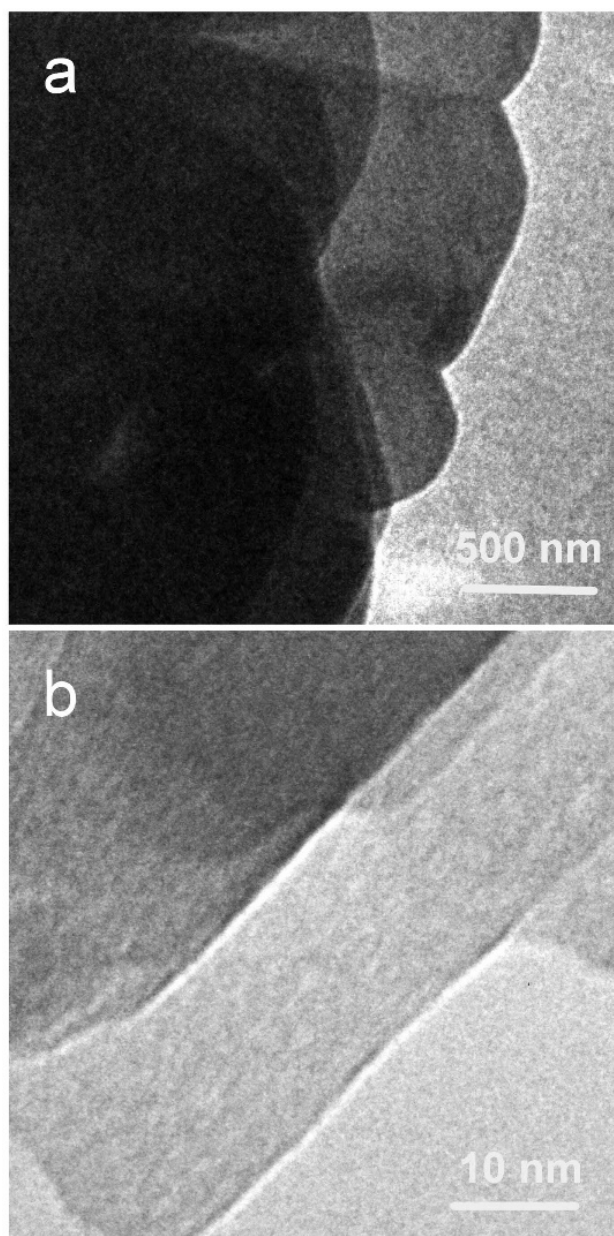

**Figure S1.** TEM image of as-prepared Mn (II) 8-hydroxyquinoline coordination flowers.

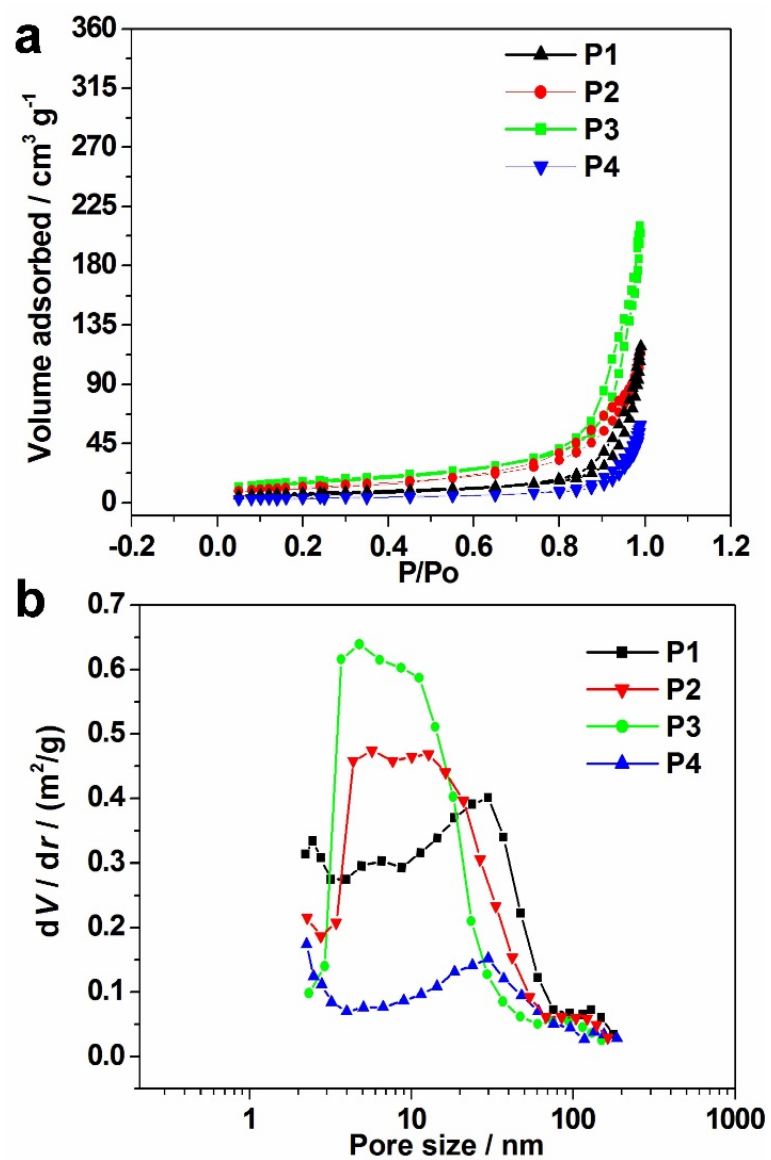

**Figure S2.** a)  $\text{N}_2$  adsorption-desorption isotherm, b) The BJH pore size distribution plot.

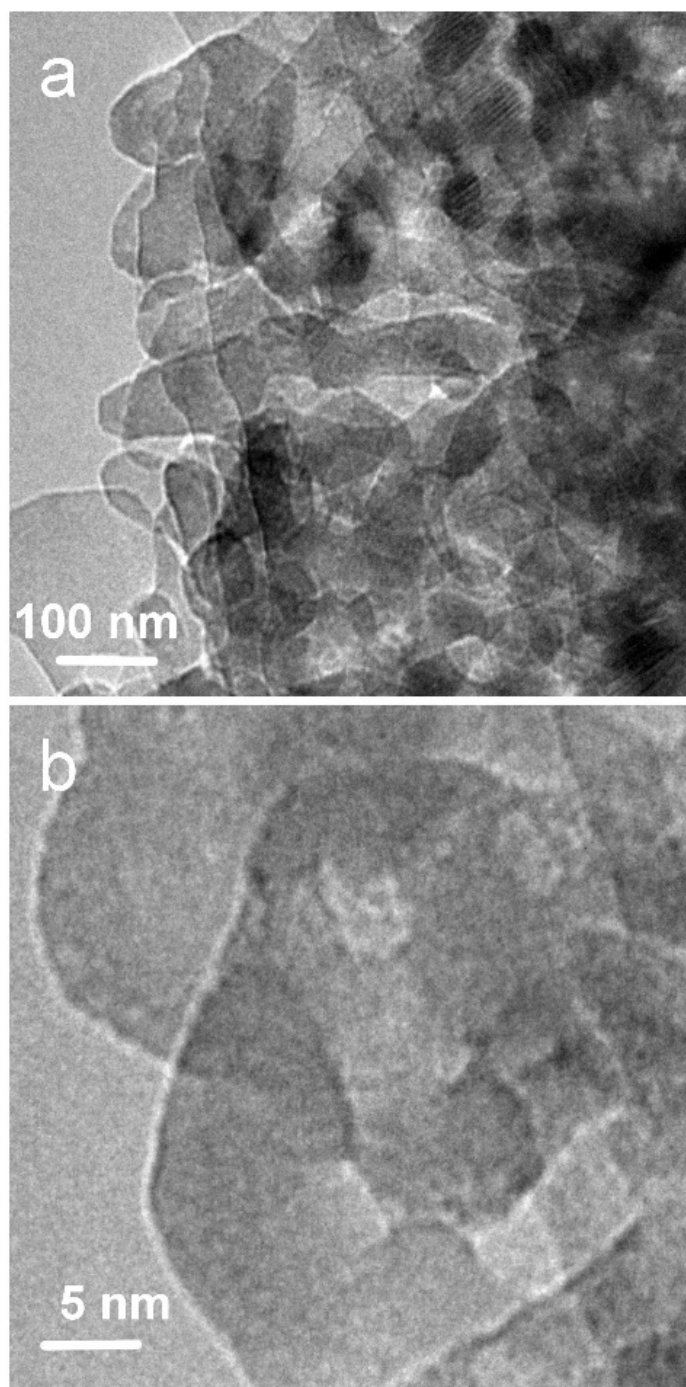

**Figure S3.** TEM images of samples after the 4000 cycling test for the P3 electrodes.

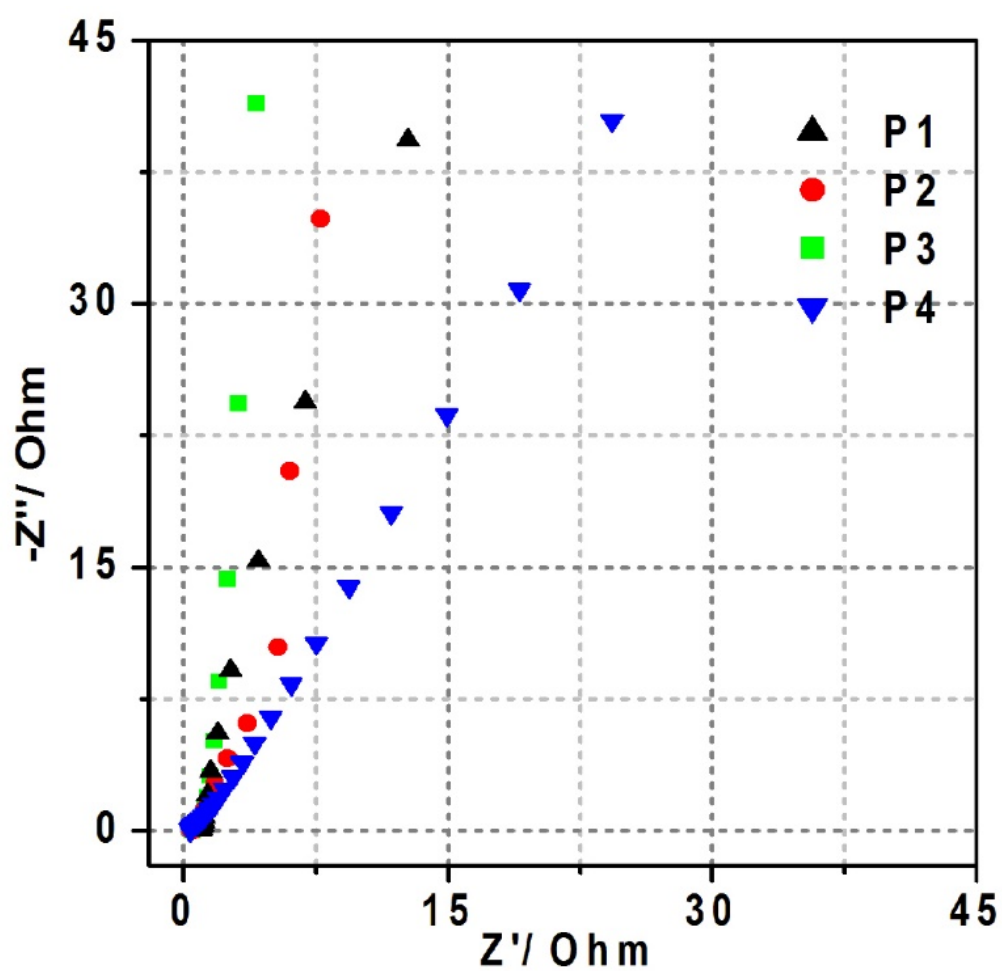

**Figure S4.** The EIS spectra of as-prepared electrodes at room temperature in the frequency range 0.01-10<sup>5</sup> Hz under open-circuit conditions.

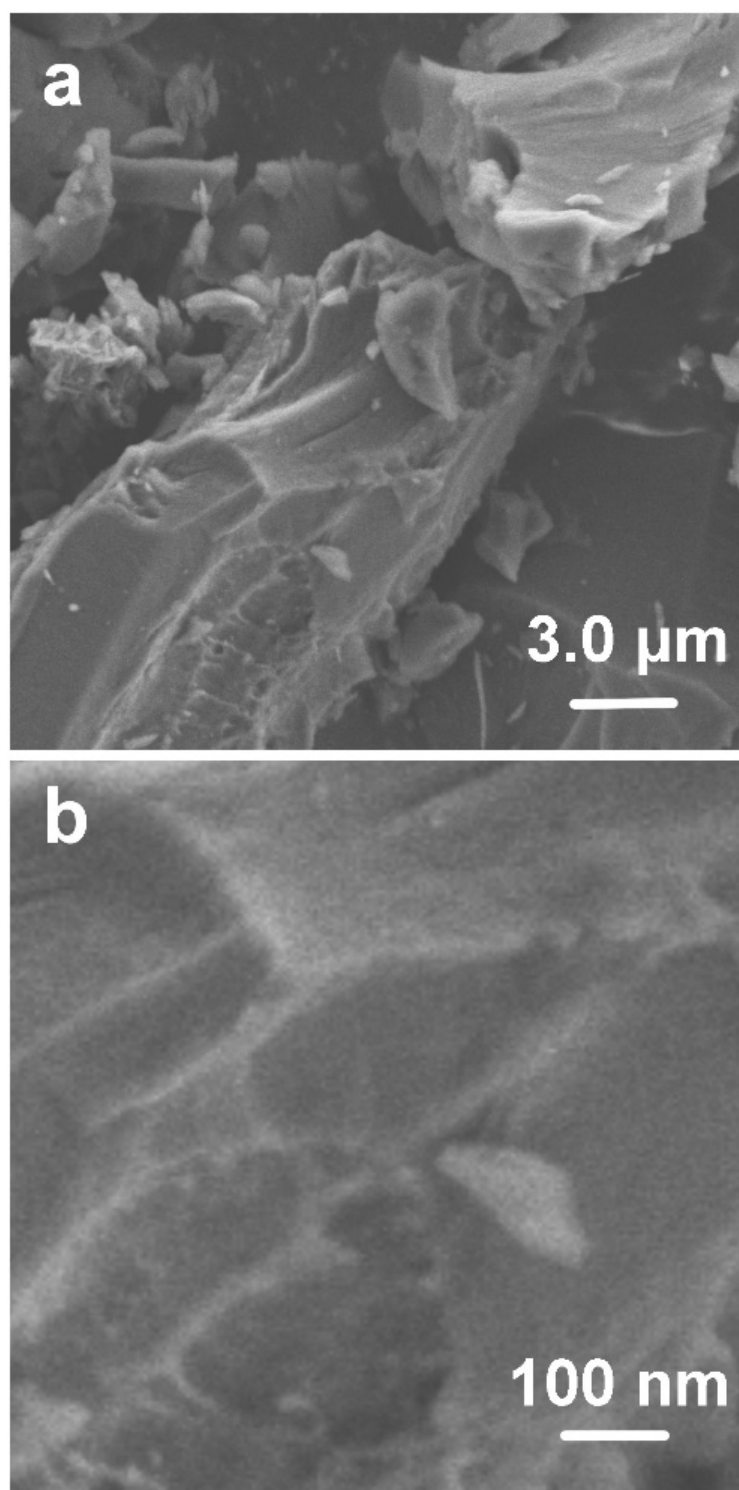

**Figure S5.** SEM images of activated carbon.

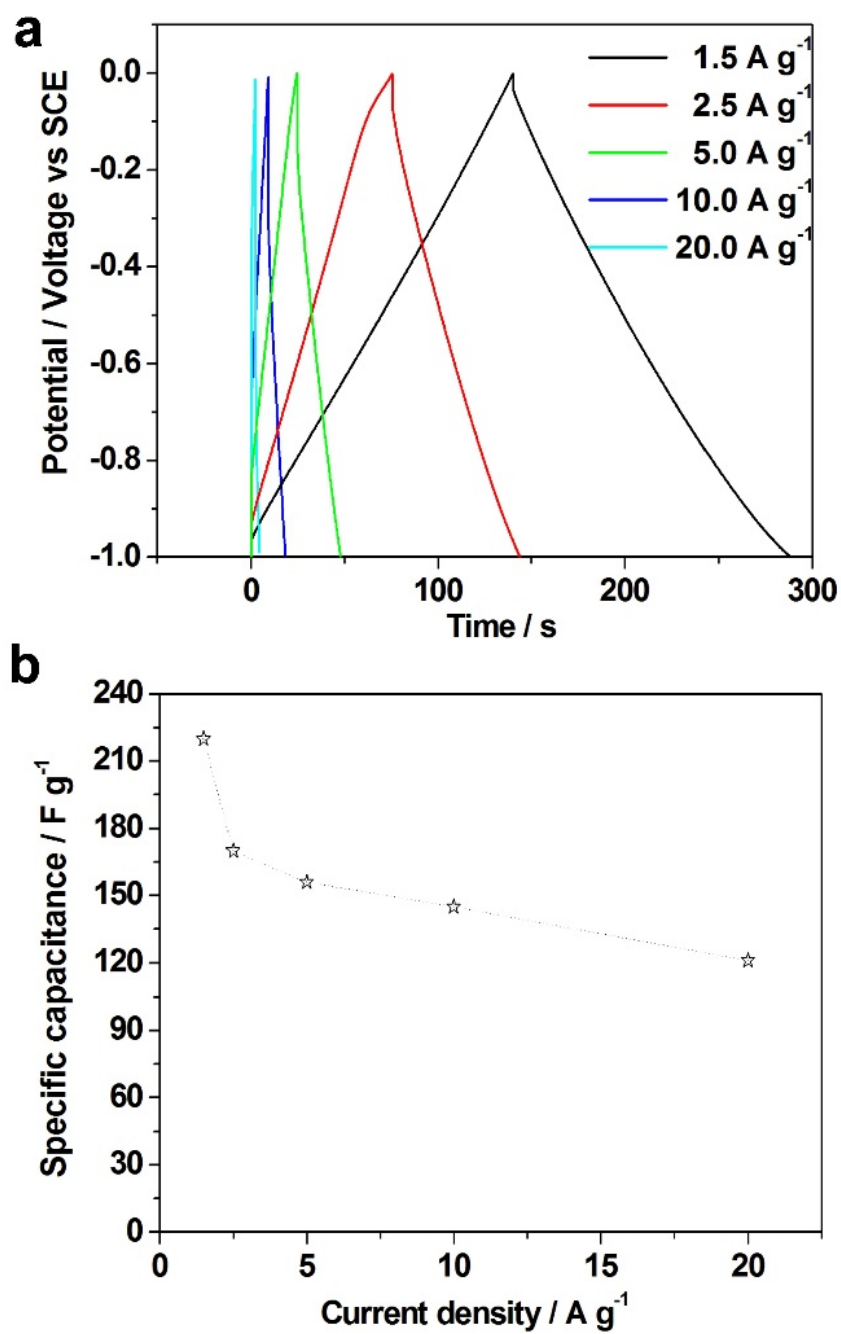

**Figure S6.** Activated carbon electrode in 1.0 M Na<sub>2</sub>SO<sub>4</sub> solution: a) CP curves with different current densities; b) Specific capacitance calculated based on the discharge curve.

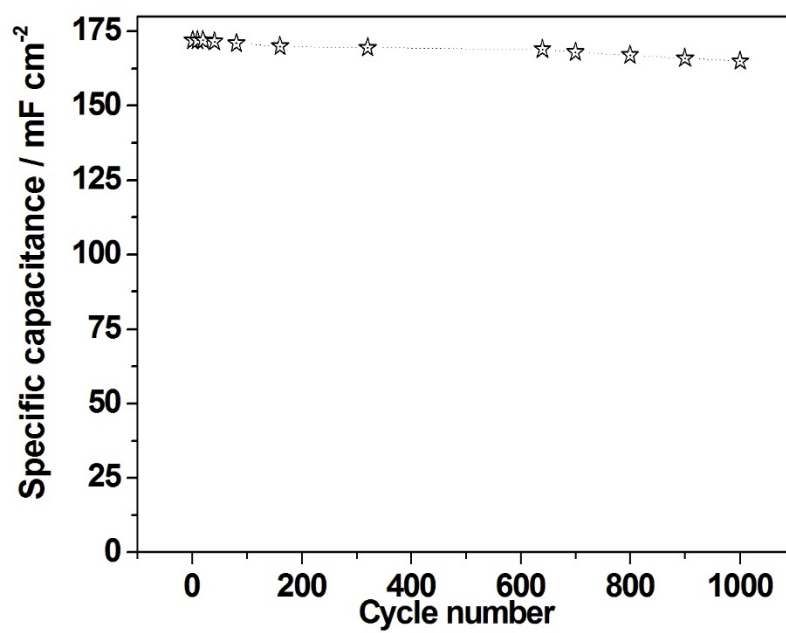

**Figure S7.** The mechanical stability (1000 cycles of bending  $90^\circ$ ) of the P3//Activated carbon flexible solid-state asymmetric supercapacitor.
